# Supplementary material for: Harnessing Artificial Intelligence to Improve Food Assistance: A Scoping Review of Machine Learning Tools
Source: Preprints.org preprint supplement (doi:10.20944/preprints202207.0221.v1), 2022-07-14
Supplement: Supplementary file 1 [file supplementary]

**Supplementary Table 1: Pubmed example search strategy**

| Search term validation | The food assistance search terms were taken from Martin et al. The machine learning terms were taken from Wang et al. |
| --- | --- |
| #1 | "Food Assistance"[Mesh] OR "Food Supply"[Mesh] |
| #2 | (food*[tw] OR meal*[tw] OR nutrition[tw] OR dietary[tw] OR diet[tw] OR "infant formula"[tw] OR "baby formula"[tw]) AND (access*[tw] OR suppl*[tw] OR assist*[tw] OR aid[tw] OR secure[tw] OR securit*[tw] OR insecure[tw] OR insecurit*[tw] OR pantr*[tw] OR bank*[tw] OR distribut*[tw] OR desert*[tw] OR system*[tw] OR relief[tw] OR rescue*[tw] OR redistribut*[tw] OR response*[tw] OR responder*[tw] OR resilienc*[tw]) |
| #3 | foodbank*[tw] OR SNAP[tw] OR "food stamp*"[tw] OR "Women Infants and Children Program"[tw] OR WIC[tw] OR "food first responder*"[tw] OR "feed the hungry"[tw] OR "emergency kitchen*"[tw] OR "free meal*"[tw] OR "free food*"[tw] OR "community pantr*"[tw] OR "food service*"[tw] OR "meal service*"[tw] OR "soup kitchen*"[tw] OR "community meal*"[tw] |
| #4 | #1 or #2 or #3 |
| #5 | ("Machine Learning"[Mesh] OR "Artificial Intelligence"[Mesh] OR "Natural Language Processing"[Mesh] OR "Neural Networks(Computer)"[Mesh] OR "Support Vector Machine"[Mesh] OR Machine learning[Title/Abstract] OR Artificial Intelligence[Title/Abstract] OR Naive Bayes[Title/Abstract] OR bayesian learning[Title/Abstract] OR Neural network[Title/Abstract] OR Neural networks[Title/Abstract] OR Natural language processing[Title/Abstract] OR support vector*[Title/Abstract] OR random forest*[Title/Abstract] OR boosting[Title/Abstract] OR deep learning[Title/Abstract] OR machine intelligence[Title/Abstract] OR computational intelligence[Title/Abstract] OR computer reasoning[Title/Abstract]) |
| #6 | ((sentiment[Title/Abstract] OR sentiments[Title] OR opinion[Title] OR opinions[Title] OR emotion[Title] OR emotions[Title] OR emotive[Title] OR affect[Title] OR affects[Title] OR affective[Title]) AND (“sentiment classification” OR “opinion mining” OR “natural language processing” OR NLP OR “text analytics” OR “text mining” OR “F-measure” OR “emotion classification”)) OR “sentiment analysis” |
| #7 | (“social network analysis”[All Fields] OR “network analysis”[All Fields]) OR “social media network analysis” OR “Twitter”) |
| #8 | #5 or # 6 or #7 |
| #12 | #4 and #8 |
| #13 | Date Limit: 2010 to Current |

Supplementary Figure 1: **Model hyperparameter selection of topic number, alpha, and beta**


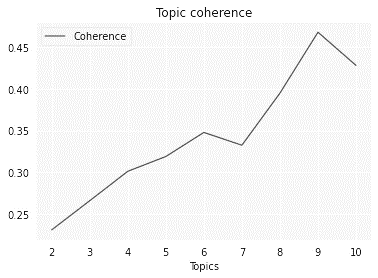


Caption: In order to select the optimal number of topics to analyze from the corpus, the coherence score, alpha, and beta model hyperparameters were calculated on 75% of the corpus as described by Kapadia.61 Using Matplotlib99 package in Python, coherence values are plotted on the y axis versus number of topics on the x axis. 9 topics had the highest coherence score.

**Supplementary Figure 2: Intertopic distance map (via multidimensional scaling)**


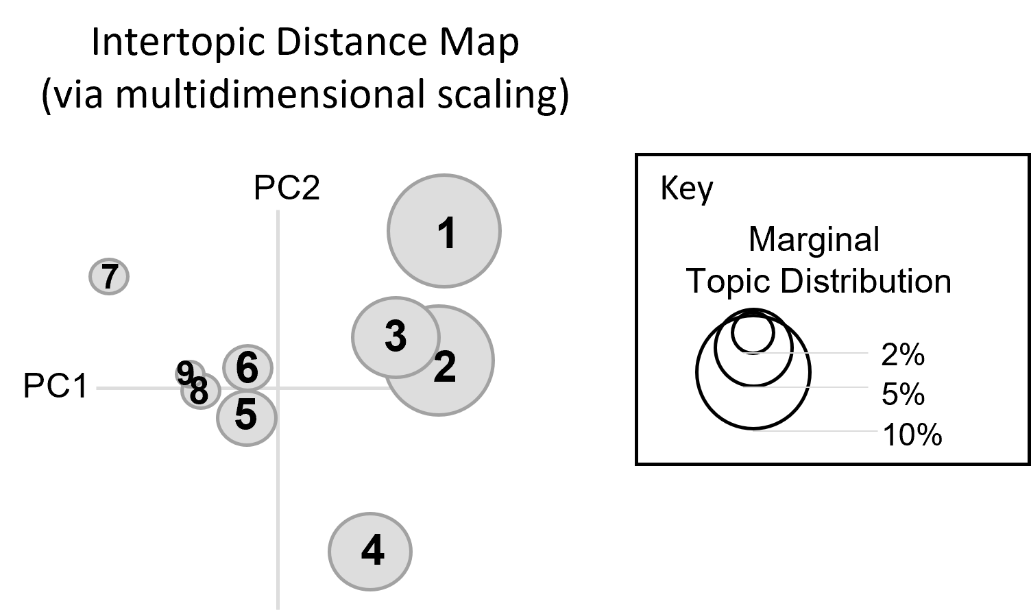


Caption: The pyLDAvis62 algorithm package in Python was used to produce a dynamic intertopic distance map (via multidimensional scaling). Each circle represents a topic. The size of the circle relates to that topic’s relative dominance within the corpus. The ideal map has little overlap between each topic. This map acts, therefore, as a visual check of the coherence value and topic number presented in Supplementary Figure 1.

**Supplementary Table 2: Results of LDA model: Topics with percent contribution**

| # | Topics | Percent Contribution |
| --- | --- | --- |
| 1 | 0.037*"churn" + 0.015*"client" + 0.015*"benefit" + 0.014*"state" + '  '0.012*"cost" + 0.012*"government" + 0.010*"recertification" + '  '0.010*"program" + 0.009*"agency" + 0.008*"fraud"' | 0.6359 |
| 2 | 0.020*"snap" + 0.019*"household" + 0.009*"new" + 0.009*"recipient" + ''0.007*"topic" + 0.007*"program" + 0.006*"exist" + 0.006*"insecurity" + ''0.006*"include" + 0.005*"level"' | 0.9996 |
| 3 | 0.011*"amount" + 0.010*"supermarket" + 0.009*"receive" + 0.008*"bank" + ''0.006*"warehouse" + 0.006*"layer" + 0.006*"event" + 0.005*"method" + ''0.005*"approximation" + 0.005*"regional"' | NA |
| 4 | 0.000*"security" + 0.000*"blockchain" + 0.000*"level" + 0.000*"measure" + ''0.000*"household" + 0.000*"insecurity" + 0.000*"drone" + 0.000*"grateful" + ''0.000*"coordinator" + 0.000*"relentlessly"' | NA |
| 5 | 0.034*"tweet" + 0.016*"classifier" + 0.011*"sentiment" + 0.010*"word" + ''0.009*"feature" + 0.007*"trend" + 0.006*"propose" + 0.006*"dataset" + ''0.006*"negative" + 0.006*"positive"' | 0.9995 |
| 6 | 0.020*"demand" + 0.014*"change" + 0.011*"country" + 0.011*"product" + ''0.007*"increase" + 0.007*"structure" + 0.007*"consumer" + 0.005*"value" + ''0.005*"pandemic" + 0.004*"flour"' | 0.9087 |
| 7 | '0.010*"system" + 0.009*"rescue" + 0.007*"value" + 0.007*"volunteer" + ''0.007*"network" + 0.007*"donation" + 0.006*"forecast" + 0.006*"give" + ''0.005*"problem" + 0.005*"expert"' | 0.9996 |
| 8 | 0.024*"security" + 0.013*"household" + 0.007*"level" + 0.007*"measure" + ' '0.006*"class" + 0.006*"crisis" + 0.006*"insecurity" + 0.005*"country" + ' '0.005*"access" + 0.005*"prediction"' | 0.9996 |
| 9 | '0.016*"mention" + 0.010*"hurricane" + 0.008*"twitter" + 0.008*"healthy" + ' '0.008*"tweet" + 0.006*"category" + 0.006*"list" + 0.006*"day" + ' '0.006*"group" + 0.006*"examine"' | 0.9995 |

**Supplementary Figure 3: Importance of topic key words: representative dominant (Topics 1, 2, 7) and non-dominant (Topic 3) topics**


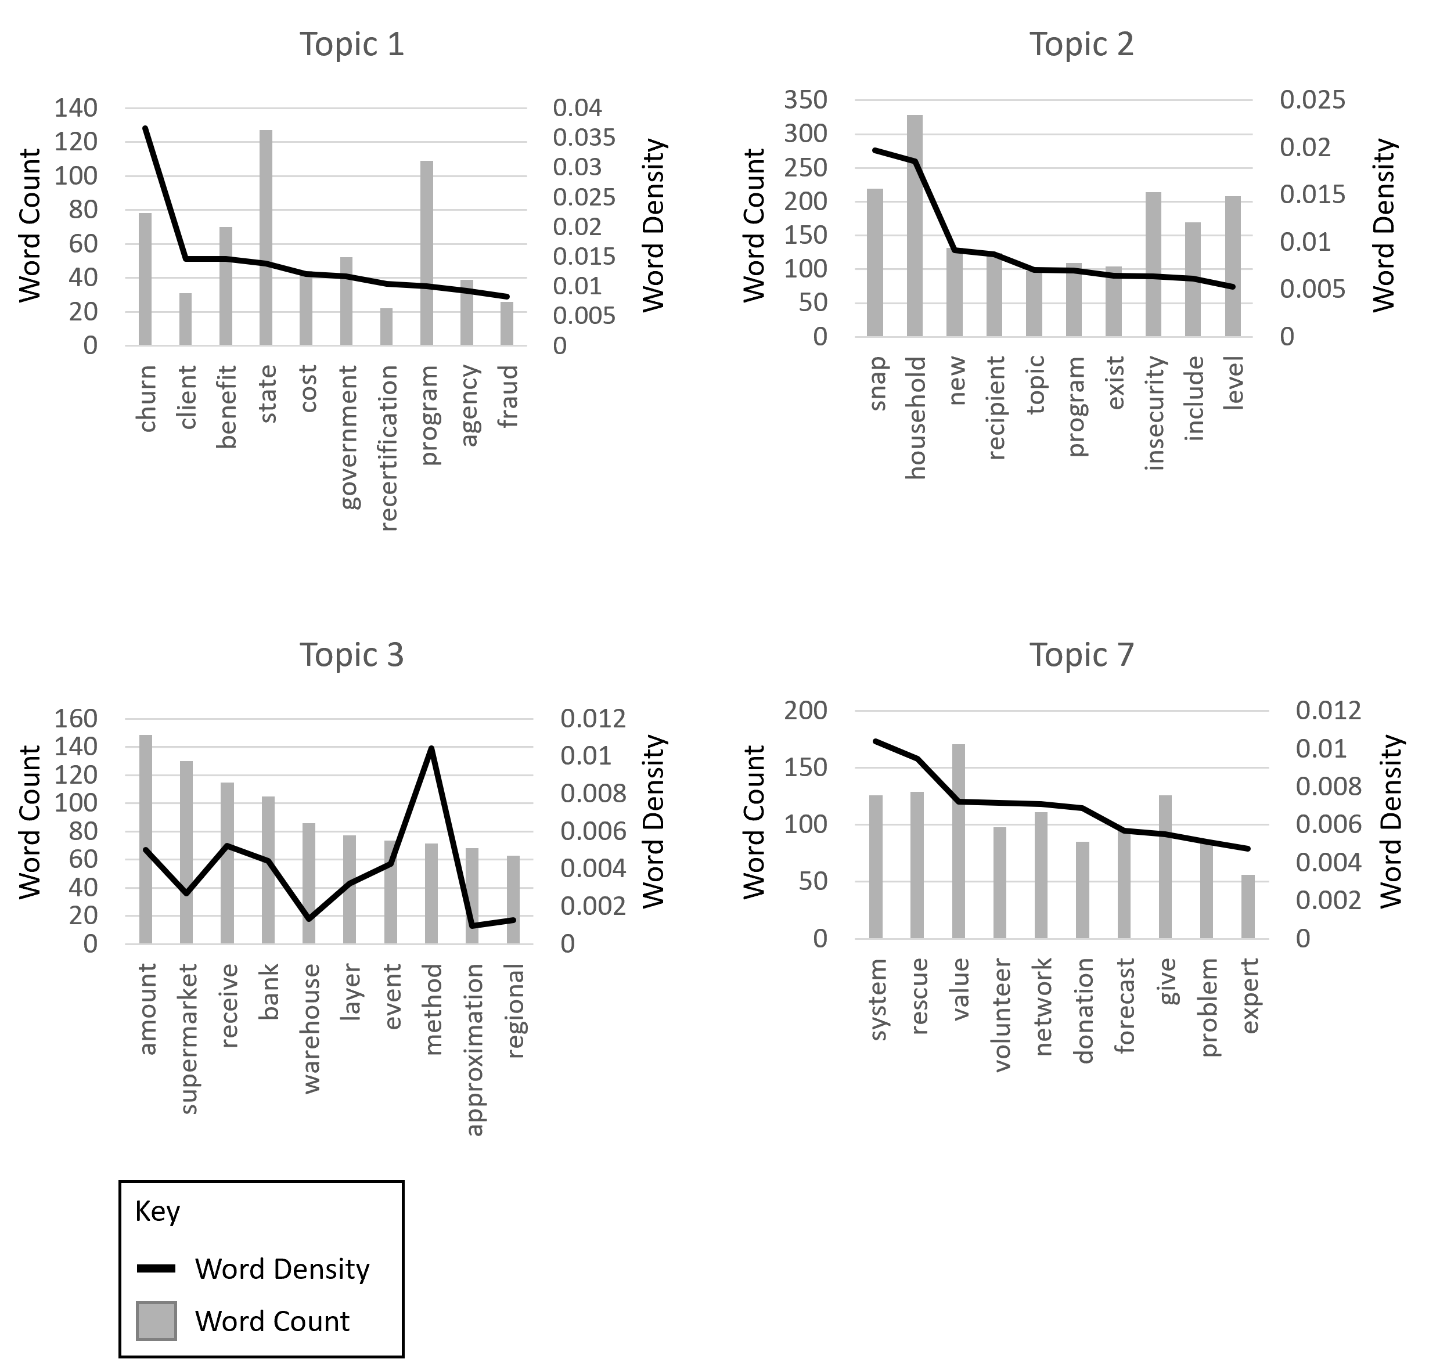


Caption: The frequency and density of keywords in the topics were calculated using TextBlob100 package in Python, shown in **Supplementary Figure 3**. These graphs show word count (left axes) versus word density (right axes) for three representative dominant topics (topics 1, 2, and 7) and one representative non-dominant topic (topic 3). Words that had lower word density than word count across multiple topics were removed from the analysis. This included, for example, *food*, *data*, and *model*.

**Supplementary Figure 4: Top 10 word frequencies related to disasters and emergencies**


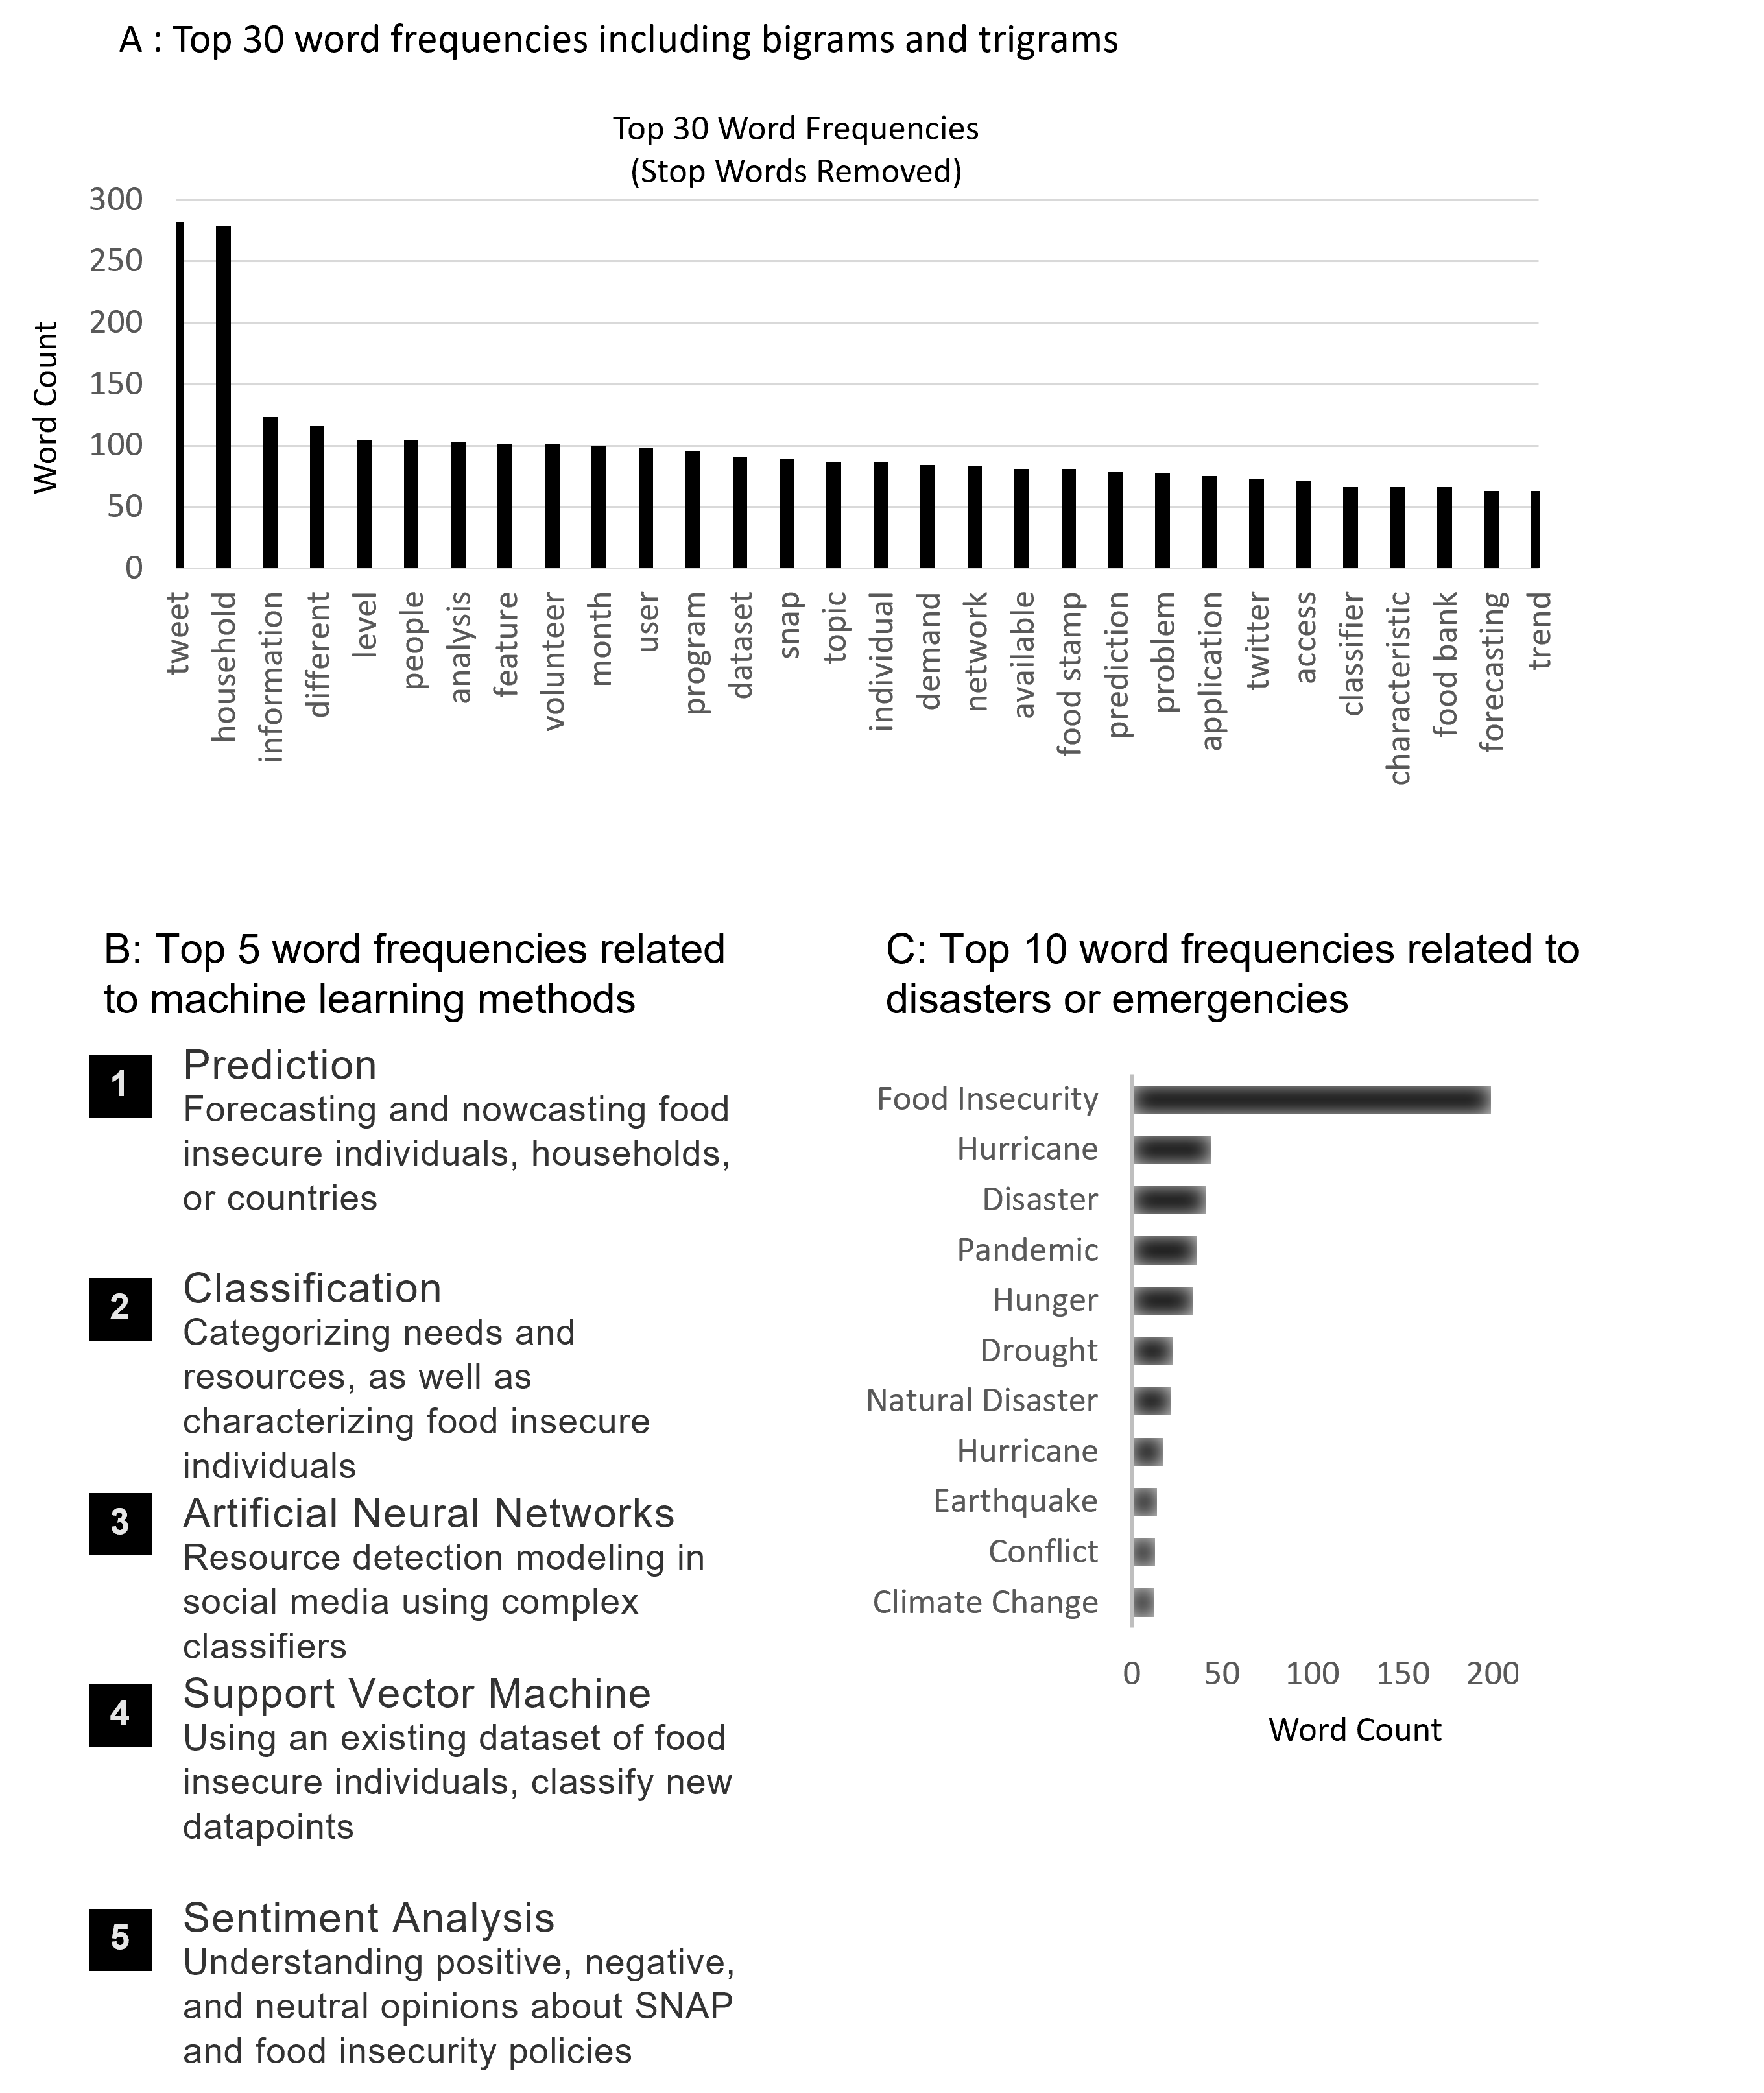


Using Textblob package in Python, word frequencies related to disasters and emergencies were calculated. 100 The top ten words and their word counts were plotted in a bar graph using Matplotlib99 package in Python.
